# Supplementary material for: Whole-heart multiparametric optical imaging reveals sex-dependent heterogeneity in cAMP signaling and repolarization kinetics
Source: PubMed Central journal article supplement (PMC9858506; doi:10.1126/sciadv.add5799), 2023-01-20
Supplement: sciadv.add5799_sm.pdf [file sciadv.add5799_sm.pdf]

Supplementary Materials for  
**Whole-heart multiparametric optical imaging reveals sex-dependent  
heterogeneity in cAMP signaling and repolarization kinetics**

Jessica L. Caldwell *et al.*

Corresponding author: Crystal M. Ripplinger, [crippinger@ucdavis.edu](mailto:crippinger@ucdavis.edu);  
Jessica L. Caldwell, [jlcaldwell@ucdavis.edu](mailto:jlcaldwell@ucdavis.edu)

*Sci. Adv.* **9**, eadd5799 (2023)  
DOI: 10.1126/sciadv.add5799

**This PDF file includes:**

Figs. S1 to S3

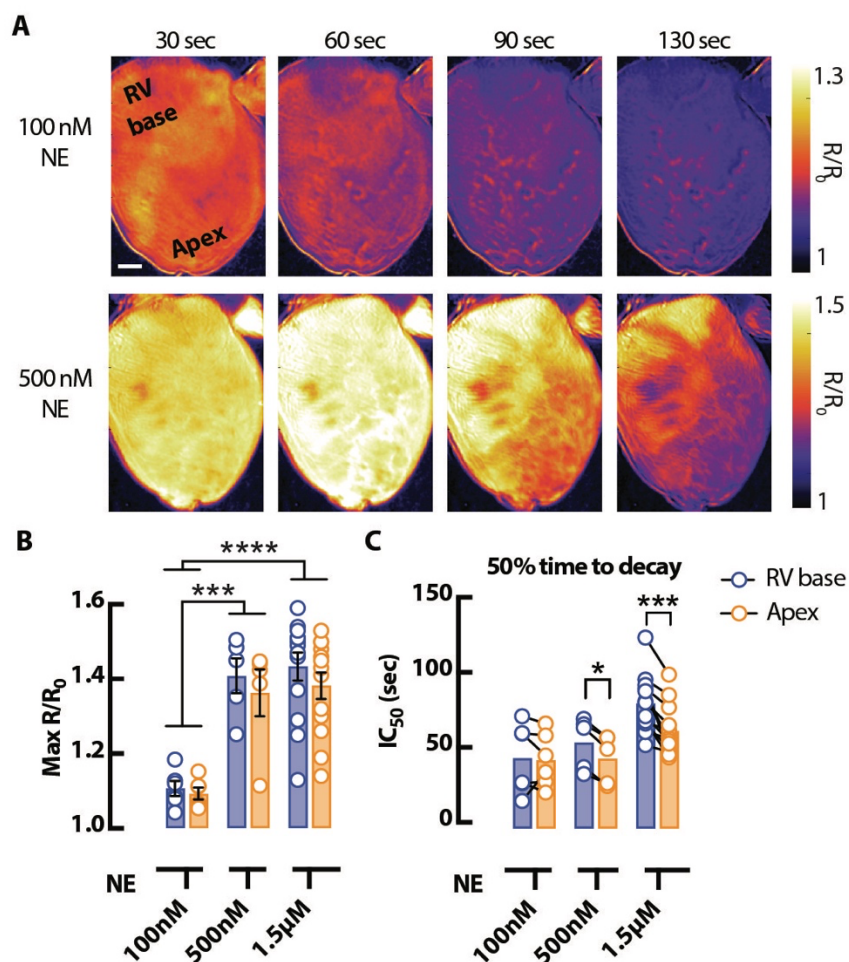

**Fig. S1. Effects of submaximal  $\beta$ -adrenergic stimulation on cAMP responsiveness.**

(A) Representative CFP/YFP whole-heart  $\Delta$  FRET ratio images showing the spatio-temporal kinetics of cAMP activity in response to submaximal (100 nM and 500 nM) bolus of NE. Scale bar = 1 mm. (B) Mean scatter dot plots showing maximal cAMP responses from RV basal (blue) and apical (orange) regions in response to increasing doses of NE bolus (100 nM, 500 nM, and 1.5  $\mu$ M). (C) FRET ratio 50% decay time calculated from  $IC_{50}$  from the same regions in (B). For 100 nM and 500 nM submaximal NE doses, N= 6 hearts from 3 male and 3 female animals. For 1.5  $\mu$ M, N= 13 hearts from 6 male and 7 female animals. Representative hearts in (A) 100 nM from a male mouse and 500 nM from a female mouse. \* $p$ <0.05; \*\*\* $p$ <0.001, \*\*\*\* $p$ <0.0001, by two-way ANOVA with multiple pairwise comparisons.

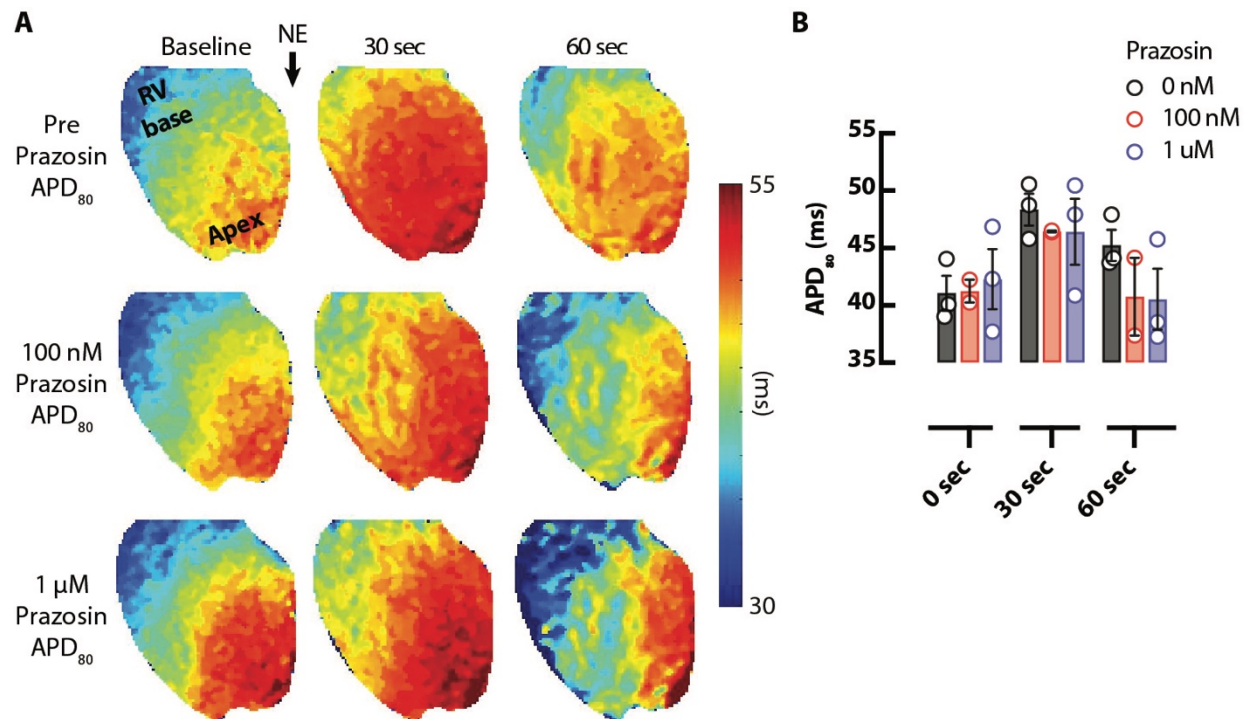

**Fig. S2. Effects of  $\beta$ -adrenergic stimulation on action potential duration with alpha-adrenergic receptor inhibition.**

(A) Representative APD<sub>80</sub> maps in response to bolus of 1.5  $\mu$ M NE before perfusion with the alpha-adrenergic receptor inhibitor prazosin and during perfusion with 100 nM or 1  $\mu$ M prazosin.

(B) Mean scatter dot plots showing APD<sub>80</sub> prolongation at 30 sec post-NE, with or without prazosin and APD<sub>80</sub> shortening at 60 sec post-NE. APD<sub>80</sub> measurements were taken from the whole field of view and averaged. For pre- and 1  $\mu$ M prazosin, N= 3 hearts from 1 male and 2 female animals. For 100 nM prazosin, N= 2 hearts from 1 male and 1 female animal. Representative heart in (A) from a male mouse.

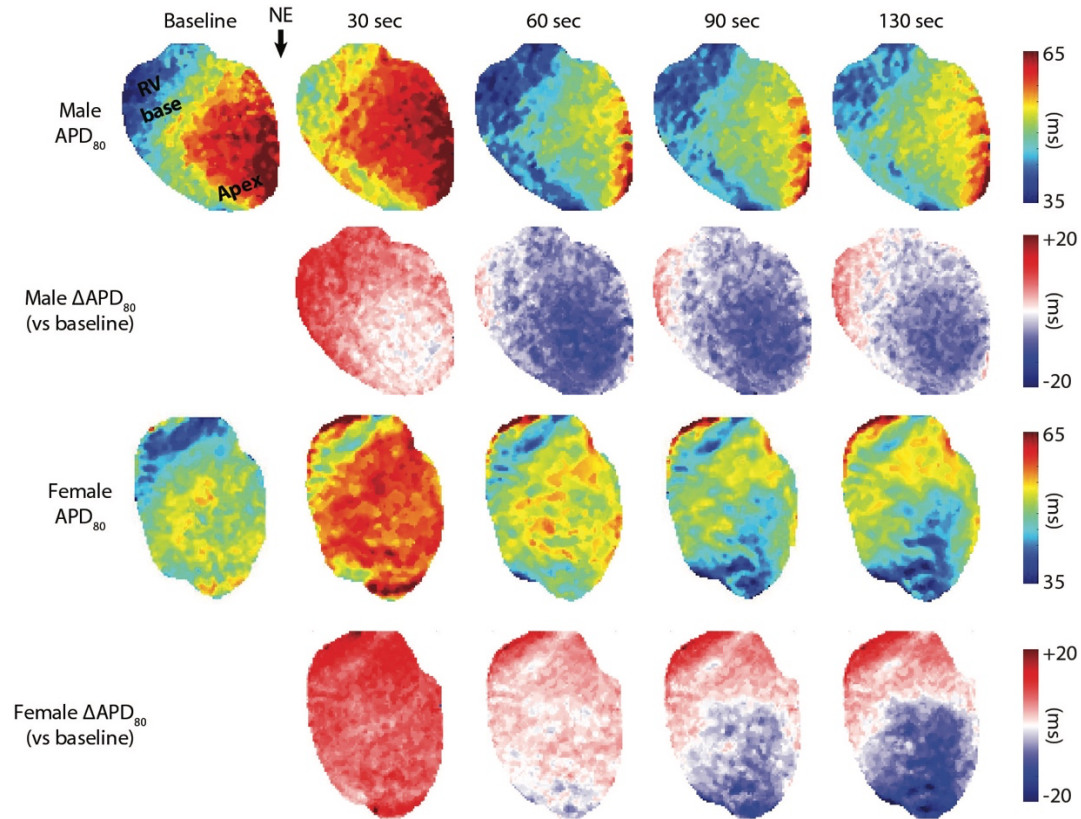

**Fig. S3. Representative action potential duration maps in response to  $\beta$ -adrenergic stimulation in male and female hearts.**

Representative APD<sub>80</sub> maps from male and female hearts with change in APD<sub>80</sub> vs. baseline ( $\Delta$  APD<sub>80</sub>) over time showing initial APD prolongation then shortening after bolus application of 1.5  $\mu$ M NE.
